# Supplementary material
Source: Research Square preprint supplement (doi:10.21203/rs.3.rs-9256977/v1)
Supplement: Supplementary file 1 [file d06c6200e619951fb8c66f81.docx]

Supplementary data

Supplement 1. Kaplan–Meier estimates the progression-free survival rate for all patients according to radiotherapy status.


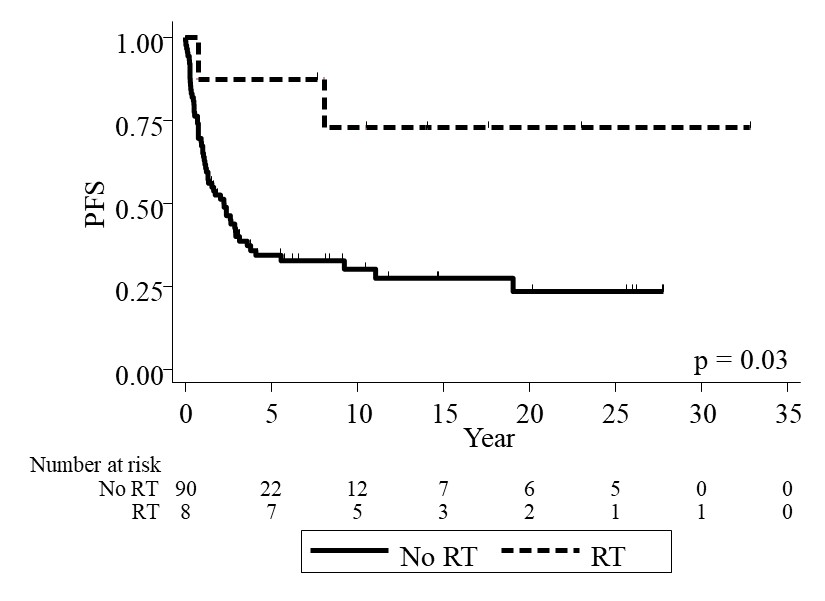


Supplement 2. Kaplan–Meier estimates the progression-free survival rate for all patients according to intra-cystic chemotherapy status.


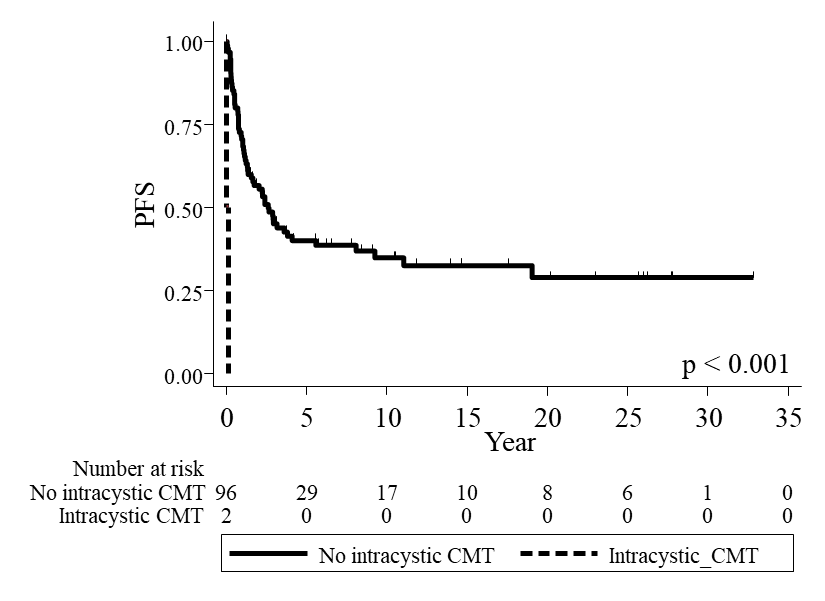


Supplement 3. Treatment modalities for primary salvage treatment after first progression.

| **Primary salvage treatment** | **N** | **%** |
| --- | --- | --- |
| No. of patients with progressive disease | 62 | 100 |
| Surgery alone   - GTR - SRT - No record | 41  6  32  3 | 66.1  14.6  78  7.3 |
| Radiotherapy (RT) | 14 | 22.6 |
| Surgery combined with RT   - GTR + RT - STR + RT | 3  0  3 | 4.8  0  100 |
| Intra-cystic CMT | 3 | 4.8 |
| No treatment | 1 | 1.6 |

Supplement 4. Kaplan–Meier estimates the second progression-free survival (PFS2) rate for all patients underwent salvage treatment.


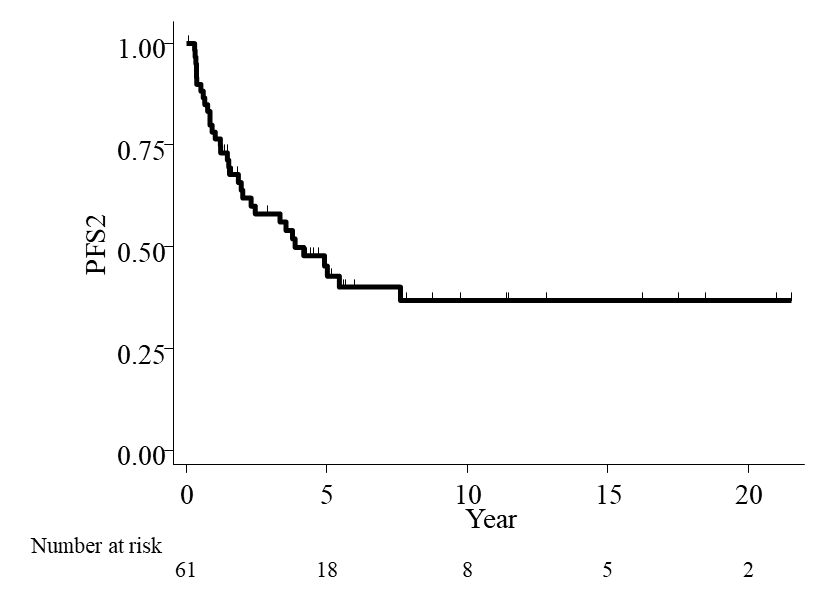


Supplement 5. Kaplan–Meier estimates the second progression-free survival (PFS2) rate for all patients underwent salvage treatment according to radiotherapy status.


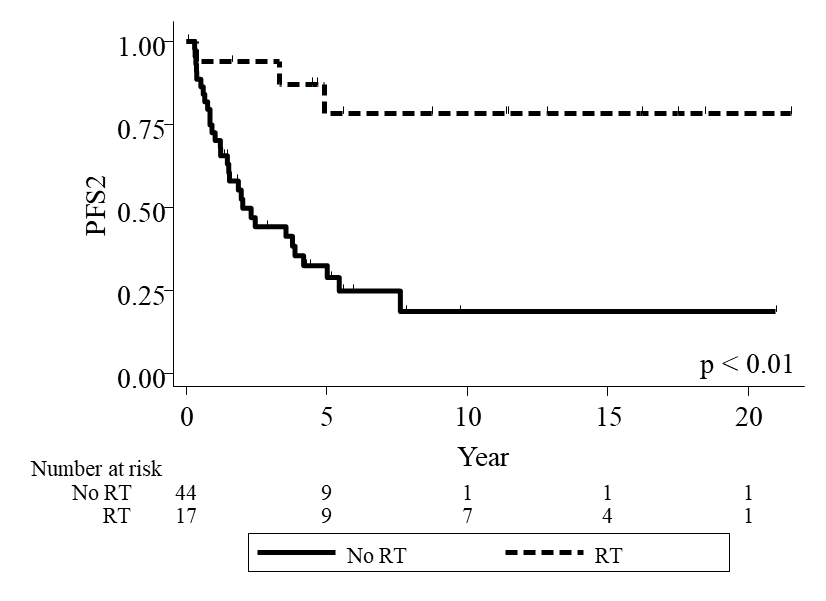


Supplement 6. Table showed endocrine status.

| **Endocrine** | **No. for pre-treatment (%)** | | | **No. for post-treatment (%)** | | |
| --- | --- | --- | --- | --- | --- | --- |
| **Available data** | **Normal function** | **Abnormal function** | **Available data** | **Normal function** | **Abnormal function** |
| Growth hormone | 34 (34.6) | 13 (38.2) | 21 (61.8) | 29 (29.6) | 24 (82.8) | 5 (17.2) |
| Hypothyroidism | 59 (60.2) | 9 (15.3) | 50 (84.7) | 51 (52) | 2 (4) | 49 (96) |
| Delay puberty | 57 (58.2) | 8 (14) | 49 (86) | 54 (55.1) | 12 (22.2) | 42 (77.8) |

Supplement 7. Table showed visual field status for pre- and post-treatment.

| **Visual field status** | **Pre-Tx N=54** | **Post-Tx N=72** |
| --- | --- | --- |
| Full | 44.4 % (n=24) | 43.1 % (n=31) |
| Unilateral hemianopia | 7.4 % (n=4) | 2.8 % (n=2) |
| Bilateral hemianopia | 24.1 % (n=13) | 22.2 % (n=16) |
| Unilateral blindness | 7.4 % (n=4) | 9.7 % (n=7) |
| Bilateral blindness | 0 % (n=0) | 6.9 % (n=5) |
| Quadratic anopia | 1.9 % (n=1) | 2.8 % (n=2) |
| Hemianopia (1 site) with Blindness (1 site) | 13 % (n=7) | 8.3 % (n=6) |
| Hemianopia (1 site) with Quadratic anopia (1 site) | 0 % (n=0) | 0 % (n=0) |
| Blindness (1 site) with Quadratic anopia (1 site) | 1.9 % (n=1) | 4.2 % (n=3) |

Supplement 8. Table showed long-term intracerebral vascular adverse events, secondary tumor and psychological problem after treatment.

| **Type of events** | **No. of patients with adverse events (%)** | **Comments** |
| --- | --- | --- |
| Intracerebral vascular disease | 6 (6.1) | -Sx alone = 3  -Sx + RT = 2  -Sx + Intra-cystic CMT = 1 |
| Secondary tumor | 2 (2) | - 1 Calcified meningioma at right  frontal convexity  - 1 Nasopharyngeal carcinoma |
| Psychological problem | 6 (6.1) | - 2 Moody, problem with emotional control  - 1 ADHD  - 1 Delirium  - 1 MDD, Panic, Anxiety  - 1 Delirium, insomnia |
